# Inter-Subject Correlation during New Music Listening: A Study of Electrophysiological and Behavioral Responses to Steve Reich's *Piano Phase*

Tysen Dauer<sup>\*1,2</sup>, Duc T. Nguyen<sup>1,3</sup>, Nick Gang<sup>1</sup>, Jacek P. Dmochowski<sup>4</sup>,  
Jonathan Berger<sup>1</sup>, and Blair Kaneshiro<sup>1,3</sup>

<sup>1</sup>*Center for Computer Research in Music and Acoustics, Stanford University, Stanford,  
CA, USA*

<sup>2</sup>*Rotman Research Institute, Baycrest Centre, Toronto, ON, Canada*

<sup>3</sup>*Center for the Study of Language and Information, Stanford University, Stanford, CA,  
USA*

<sup>4</sup>*Department of Biomedical Engineering, City College of New York, New York, NY, USA*

April 28, 2021

---

\*Corresponding author: [tysend@ccrma.stanford.edu](mailto:tysend@ccrma.stanford.edu). Center for Computer Research in Music and Acoustics, 660 Lomita Dr., Stanford, CA 94305 USA

## Abstract

Musical minimalism utilizes the temporal manipulation of restricted collections of rhythmic, melodic, and/or harmonic materials. One example, Steve Reich's *Piano Phase*, offers listeners readily audible formal structures containing unpredictable events at local levels. Pattern recurrences may generate strong expectations which are violated by small temporal and pitch deviations. A hyper-detailed listening strategy prompted by these minute deviations stands in contrast to the type of listening engagement typically cultivated around functional tonal Western music. Recent research has suggested that the inter-subject correlation (ISC) of electroencephalographic (EEG) responses to natural audio-visual stimuli objectively indexes a state of "engagement", demonstrating the potential of this approach for analyzing music listening. But can ISCs capture engagement with minimal music, which features less obvious expectation formation and has historically received a wide range of reactions? To approach this question, we collected EEG and continuous behavioral (CB) data while 30 adults listened to an excerpt from Steve Reich's *Piano Phase*, as well as three controlled manipulations and a popular-music remix of the work. Our analyses reveal that EEG and CB ISC are highest for the remix stimulus and lowest for our most repetitive manipulation. In addition, we found no statistical differences in overall EEG ISC between our most musically meaningful manipulations and Reich's original piece. We also found that aesthetic evaluations corresponded well with overall EEG ISC. Finally we highlight co-occurrences between stimulus events and time-resolved EEG and CB ISC. We offer the CB paradigm as a useful analysis measure and note the value of minimalist compositions as a limit case for studying music listening using EEG ISC. We show that ISC is less effective at measuring engagement with this minimalist stimulus than with popular music genres and argue that this may be due to a difference between the type of engagement measured by ISC and the particular engagement patterns associated with minimalism.

**Keywords** inter-subject correlation (ISC) engagement continuous behavioral measure music cognition minimalism EEG

**Declarations of interest** None

# 1 Introduction

The genre of musical minimalism is famously (or, perhaps infamously depending on the listener) characterized by highly recurrent, starkly restricted pitch and rhythmic collections. From the early days of scholarship on minimal, or “repetitive music” as it was often called, commentators described the music’s timbral and rhythmic staticity and its limited pitch patterns (Mertens, 1983, p. 12). While many advocates reported what we might call blissing out to this “meditative music” (to use yet another early term for this repertoire), some composers went on record to state their intention that the music should be listened to carefully (Henahan, 1970; Strongin, 1969). For example, the composer Steve Reich wrote in 1968 that he wanted to write works with musical processes that listeners could perceive: works where the process unfolded very gradually in order to “facilitate closely detailed listening” (Reich, 2009, p. 34). Reich’s *Piano Phase* (1967) shows how this type of granular listening might unfold. The piece, written for two pianos or marimbas, alternates between two distinct and highly repetitive states resulting from a single process. During in-phase sections, the two performers play a short musical unit in rhythmic unison, though varying in pitch alignment (Figure 1). In between these in-phase sections, one performer gradually accelerates, resulting in unpredictable note onsets (i.e., phasing sections). Over time these phasing sections lead to a new pitch alignment in the subsequent in-phase section.<sup>1</sup> The driving phasing process

---

<sup>1</sup>The piece begins with one pianist (Pianist 1) playing a twelve-note pattern consisting entirely of sixteenth notes and containing five unique pitches in the treble register. The pattern can be divided into two groups of six sixteenth notes, and Reich gave a metronome marking of 72 beats per minute to the dotted quarter note (one group of six sixteenth notes). The score consists of numbered modules that are repeated an indeterminate number of times: Reich noted approximate ranges for the number of repetitions above each module. After the pattern is established in the first module, the second pianist (Pianist 2) fades in, playing the identical pattern in unison with Pianist 1. After repeating the pattern in unison for some time, Pianist 2 accelerates very slightly while Pianist 1 holds the opening tempo, causing the sound from the two pianos to wobble out of sync to varying degrees as the pattern is repeated at different tempos (we call these portions *phasing* sections). Various and unpredictable rhythm and pitch events emerge and disappear in these phasing sections. Eventually Pianist 2’s acceleration process culminates in another unison module where each pianist’s sixteenth notes are once again realigned (which we label *in-phase* sections). While the pianists’ rhythms are realigned, the pitch content of the pattern will have shifted: In this example, Pianist 2 aligns the second pitch of the opening pattern with the first pitch of the pattern (played by Pianist 1). *Piano Phase* proceeds by alternating between phasing and in-phase sections, where each successive in-phase section presents the next shifted alignment of the opening, twelve-note pattern (note three aligns with the first note of the pattern, a phasing section occurs, then note four aligns with the first note of the pattern, etc.).

19 offers the listener an outline of how the piece unfolds at a macro-level while leaving many  
20 details unpredictable—from rhythms during the phasing sections to accent patterns during  
21 in-phase sections. For a listener interested in detailed minutia and slight variation, the work  
22 may fascinate; in other moods or with other priorities, the piece can bore, confuse, and even  
23 anger (Rockwell, 1973). How might we measure listeners’ engagement with such repertoire,  
24 given its reduced musical parameters and varied and polarized reception (Dauer, 2020)?

♩. = ca. 72  
Repeat each bar approximately number of times written. / Jeder Takt soll approximativ wiederholt werden entsprechend der angegebenen Anzahl. / Répétez chaque mesure à peu près le nombre de fois indiqué.

1 (x4-8) r.h. l.h. mf non legato  
2 (x12-16) r.h. l.h. mf fade in non legato  
3 (x4-16) (x16-24) (x4-16) hold tempo 1 accel very slightly hold tempo 1 a. v. s.

Figure 1: The opening modules from Steve Reich’s *Piano Phase*. Lines under the staff indicate sections: blue lines are in-phase sections and red lines are phasing sections.

25 Recent research using the high temporal resolution of electroencephalography (EEG)  
26 has suggested that the correlation of neural responses among participants (inter-subject  
27 correlation, or ISC) in response to natural audio-visual stimuli objectively indexes a state  
28 of “engagement” (Dmochowski et al., 2012). Ensuing studies have extended this work to  
29 musical stimuli and demonstrated how ISC may be a powerful tool for analyzing listening  
30 (B. Kaneshiro et al., 2020; Madsen et al., 2019; B. Kaneshiro et al., 2021). B. Kaneshiro et al.  
31 (2020) presented popular, Hindi-language songs from “Bollywood” films to participants and  
32 reported higher behavioral ratings and ISCs for their original versions when compared with  
33 phase-scrambled manipulations. Madsen et al. (2019) drew on instrumental compositions  
34 (nineteen Western classical musical works in a variety of styles, and one Chinese folk song)  
35 to establish that ISCs decrease over repeated exposures to familiar music (though ISCs were  
36 sustained for participants with musical training). Most recently, B. Kaneshiro et al. (2021)  
37 investigated participants’ time-resolved ISCs in response to the first movement of Edward

38 Elgar’s Cello Concerto in E minor, Op. 85. In contrast to the stimuli used in these previous  
39 studies, and true to minimalism’s stereotypical characteristics, Reich’s *Piano Phase* features  
40 a high level of repetition, unchanging timbre, and narrow pitch content.<sup>2</sup>

41 Our primary research question was to uncover whether participants shared engagement  
42 patterns (as measured by ISC) while listening to *Piano Phase*. In particular, we hypothesized  
43 that phasing sections would be more engaging (i.e., elicit more correlated responses) than  
44 in-phase sections, due to phasing sections’ rhythmic variety and unpredictability coupled  
45 with a wider variety of pitch interactions. If listeners deployed the hyper-detailed listening  
46 strategy described above, phasing sections would offer rich content with which to engage. On  
47 the other hand, detailed listening during phasing sections could lead to divergent patterns  
48 of engagement as listeners lock on to different dimensions or aspects of the music during  
49 these more eventful sections. Since ISC depends on time-locked similarities in neural data,  
50 these divergent but equally engaged listening styles may not result in significant correlations.  
51 To test this possibility, we introduced manipulations of *Piano Phase*. First, we created a  
52 version without phasing sections, anticipating that ISC would be lower for this manipulation  
53 if such phasing sections were being picked up in the original version. Second, listeners  
54 have also historically reported an arguably more mood-driven type of engagement with this  
55 type of music, which, in contrast with detailed listening, allows for a more internal floating  
56 away of attention, still connected to the stimulus but unlikely to be correlated between  
57 participants (Lloyd, 1966). Therefore, we also included a manipulation of *Piano Phase*  
58 with frequent changes in the content (resulting from reshuffling five-second segments of the  
59 original excerpt). If ISC indexes this style of engagement in *Piano Phase*, we predicted  
60 less of the listening style for this manipulation. To examine the possibility of listeners  
61 being bored by the original work, we also introduced a third control stimulus with extreme  
62 repetition, which we expected to elicit no meaningful engagement. Finally, we included a  
63 commercial remix of Reich’s original work in a popular style, which we conjectured would

---

<sup>2</sup>We note that Madsen et al. (2019) did include Philip Glass’s *String Quartet No. 5* (1991): a more popular or “post-minimalist” work by comparison.

64 engage listeners and elicit EEG ISC comparably to previous experiments (B. Kaneshiro et  
65 al., 2020; B. B. Kaneshiro, 2016).

66 In line with recent work, we computed ISCs over entire excerpts and in shorter, overlap-  
67 ping time windows, giving us a sense of overall engagement as well as moment-to-moment  
68 patterns shared between audience members (Dmochowski et al., 2012; B. Kaneshiro et al.,  
69 2021). To provide complementary measures of what ISC is reliably indexing, participants  
70 rated the stimuli and additionally completed a second experimental block where they con-  
71 tinuously reported their level of engagement with the stimuli. This allowed us to compare  
72 relationships for both overall and time-resolved neural and behavioral measures.

73 Other researchers have used minimalist compositions as experimental stimuli, similarly  
74 taking advantage of the works' unusual musical properties. Musicologist Keith Potter and  
75 computer science colleagues used two early works by Philip Glass to compare information  
76 dynamics and musical structure (Potter et al., 2007). Psychologist Michael Schutz worked  
77 with percussionist Russell Hartenberger to examine desynchronization among performers of  
78 Reich's *Drumming* (Hartenberger, 2016),<sup>3</sup> and Daniel Cameron and colleagues have studied  
79 experiences of groove and neural entrainment using Reich's *Clapping Music* (D. J. Cameron  
80 et al., 2019; D. Cameron et al., 2017). Dauer et al. (2020) examined preattentive cortical  
81 responses to various types of formal repetition using synthesized melodies based on early  
82 minimalist compositional techniques. The current study takes minimalism as an edge case  
83 in the applicability of neural correlation, uniting the repertoire's extreme musical techniques  
84 (and unique reception history) with multivariate techniques for analyzing brain data.

---

<sup>3</sup><https://maplelab.net/reich/>

## 2 Methods

### 2.1 Stimuli

All five stimuli in the experiment are related to Steve Reich’s *Piano Phase*, a much-anthologized example of American minimalism for two pianos or marimbas (Figure 1). In the experiment we used pianists Nurit Tilles and Edmund Neimann’s 1987 recording on the album *Reich “Early Works”* released by Double Edge (Reich, 1987). We used the first five minutes and five seconds (5:05) of the track’s 20:26 duration. We refer to this excerpt of *Piano Phase* used in the experiment as the *Original* condition (Figure 2A).<sup>4</sup>

*Piano Phase* is useful for exploring the limits of ISC in measuring musical engagement because it offers contrasting sections (phasing and in-phase) with slightly varying musical content for comparison while holding many other musical parameters constant: timbre, dynamics (largely), instrumentation, pitch content, and absence of lyrics or vocal content. These features make it uncommonly amenable to the creation of the stimulus manipulations used in this study.

Using MATLAB software, we created three stimulus conditions of equal duration, each based on the content of the excerpt used in the Original condition. First, in the *Abrupt Change* condition, (Figure 2B) all phasing sections from the Original excerpt were replaced with exact repetitions of the preceding in-phase material. The stimulus thus presents repetitions of an in-phase motif through the section where the phasing would have occurred, and then shifts abruptly to the next in-phase section as closely as possible to its occurrence in the original recording. For example, the stimulus begins with the in-phase section where Pianist 1 and Pianist 2 align the first notes of the twelve-note pattern. This continues without phasing until suddenly the next in-phase section emerges, where Pianist 2 aligns the second note of the pattern with the first note of the pattern played by Pianist 1. Thus, the *Abrupt Change* condition is, in essence, form without function: where regular markers of formal

---

<sup>4</sup>A meter shift and accompanying pattern change occur later in the piece, but after the excerpt used in the experiment.



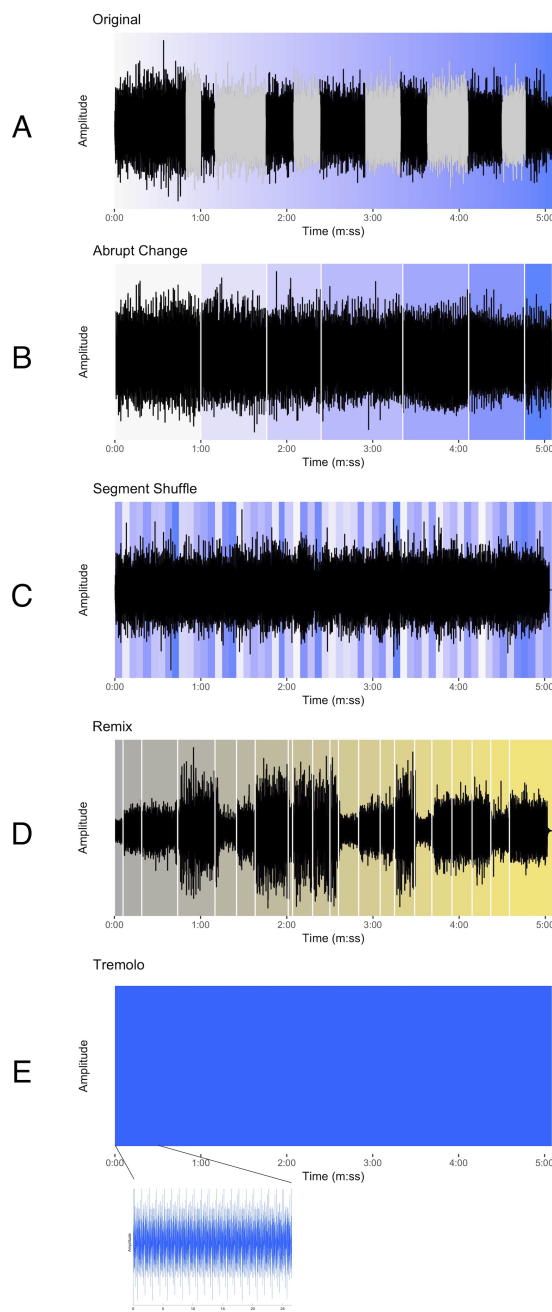

Figure 2: The waveforms for each of the stimuli in the experiment. (A) Original, with phasing sections colored gray and the progression of events represented by the gradual change of color from white to blue. (B) Abrupt Change, white lines denoting sudden shift from one in-phase section to the next and background color showing approximate location of in-phase material in the Original condition. (C) Segment Shuffle, random re-ordering of five-second units shown using original color in Original. (D) Remix (Winn's *Piano Phase (D\*Note's Phased & Konfused Mix)*), gradual progression of events represented with color change from gray to yellow and key musical events beginning with white lines. (E) Tremolo, appearing as an unchanging block when zoomed out, but in the lower plot, zoomed in to show the reiterated pitch material.

110 sections (i.e., points of arrival at the alignments of in-phase sections) are situated without  
111 the functional transitions (i.e., the phasing sections).

112 As a contrast to the sudden changes embodied by the Abrupt Change condition, we  
113 created the *Segment Shuffle* condition (Figure 2C). Here we divided the Original audio into  
114 five-second segments and randomly reordered them (i.e., “shuffled” them). In order to avoid  
115 abrupt disjunct shifts, the transitions between segments were smoothed by applying a linear  
116 crossfade. The five-second segments included both phasing and in-phase material, meaning  
117 that upcoming content was unpredictable for listeners. In contrast with the Abrupt Change  
118 condition, Segment Shuffle featured function without form: constant, potentially surprising  
119 changes with no overarching formal scheme.

120 Finally, we synthesized a stimulus with neither form nor function, taking the repetition  
121 aspect of minimalist music to an extreme. Our *Tremolo* condition (Figure 2E) consisted  
122 solely of the aggregated pitch content of *Piano Phase* presented as a block chord, reiterated  
123 at Reich’s opening tempo marking and lasting the duration of the Original excerpt.

124 For comparison with the more popular genres of audio material used in previous ISC  
125 studies, we also included Matt Winn’s *Piano Phase (D\*Note’s Phased & Konfused Mix)*, an  
126 homage to Reich’s piece released on the 1999 *Reich Remixed* album (Reich, 1999); we refer  
127 to this condition as *Remix* for short. Winn’s dance music group, D\*Note, draws on sounds  
128 from electronica and jazz, and these influences show up in *Remix* alongside samples from  
129 Reich’s piece.<sup>5</sup> The entire track was used in the experiment and its duration (5:05) informed  
130 the length of the other stimuli. Listening to *Remix*, we identified moments (musical events)  
131 that we predicted would engage listeners (for a full list, see Table S1). These events guided  
132 our interpretation of time-resolved EEG and continuous behavioral (CB) results.

133 All stimuli were presented to participants as mono .wav files; the second audio channel was  
134 embedded with intermittent square-wave pulses which were used as precise timing triggers  
135 (see § 2.3 and B. Kaneshiro et al. (2020)).

---

<sup>5</sup><https://www.mattwinn.co.uk/about>

## 136 **2.2 Participants**

137 We were interested in listeners' initial experiences of Reich's piece and sought participants  
138 who were unlikely to have heard the composition before. Participants had to be 18–35 years  
139 old, have normal hearing, be right-handed, have no cognitive or decisional impairments,  
140 be fluent in English, and have had no individual musical instrument or vocal training, nor  
141 musical education after high school (or equivalent).

142 The participant sample ( $N = 30$ ; 19 female, 11 male) had a mean age of 23.8 years (rang-  
143 ing from 18 to 35 years). Twelve participants reported some formal musical training ranging  
144 from 2 to 16 years (average of 4.5 years) including activities such as elementary school band  
145 and orchestra and piano lessons in middle school. Only two participants reported ongoing  
146 musical activities (amateur ukulele playing and occasional jam sessions). All participants  
147 reported listening to music regularly, from 0.2 to 8 hours a day (average of 2.4 hours per  
148 day).

## 149 **2.3 Experimental paradigm and data acquisition**

150 The Stanford University Institutional Review Board approved this research, and all partic-  
151 ipants gave written informed consent before completing the experiment. After discussing  
152 and signing the consent form, each participant completed questionnaires about demographic  
153 information and musical experience. Each participant then completed two blocks: one EEG  
154 (Block 1) and one behavioral (Block 2), both conducted in an acoustically and electrically  
155 shielded ETS-Lindgren booth. The participant completed a brief training session to acquaint  
156 them with the interface and task before the experimenter donned the EEG net. The partic-  
157 ipant was told to sit comfortably in front of the monitor and view a fixation image While  
158 EEG was recorded. Participants listened to each of the five stimuli once in random order.  
159 Participants did not perform any task during the presentation of the stimuli and were told  
160 to refrain from moving their body in response to the music: they were told not to tap their  
161 feet or hands, or bob their heads. After each stimulus in Block 1, the participant rated

162 how pleasant, well ordered, musical, and interesting the preceding stimulus was on a scale  
163 of 1 (not at all) to 9 (very) via key press using a computer keyboard. Participants were  
164 permitted to move and take short breaks in between stimuli (during which time a “break”  
165 screen appeared). When ready, the participant initiated the next stimulus by pressing the  
166 space bar on the keyboard.

167 The EEG net was removed after Block 1, and the participant returned to the sound booth  
168 to complete Block 2. Here the participant heard the same five stimuli (in random order)  
169 and this time completed a continuous behavioral task while listening. Their task was to  
170 continuously report their level of engagement—which was defined as “being compelled, drawn  
171 in, connected to what is happening, and interested in what will happen next” (Schubert et  
172 al., 2013)—over the duration of each stimulus. To perform this task, the participant used  
173 a computer mouse to control a slider shown on the computer monitor. After each stimulus,  
174 the participant rated how engaging they found the preceding stimulus to be overall, using  
175 the same 1–9 key press scale used in Block 1. The ordering of blocks was not randomized  
176 (i.e., the EEG block always preceded the CB block) because we wanted to ensure that during  
177 recording of EEG data in Block 1, participants would not be biased with the definition of  
178 engagement and the continuous reporting task that came in Block 2.

179 The experiment was programmed in MATLAB using the Psychophysics Toolbox (Brainard,  
180 1997). Stimuli were played through two Genelec 1030A speakers located 120 cm from the  
181 participant. Stimulus onsets were precisely timed by sending square-wave pulses to the EEG  
182 amplifier from a second audio channel (not heard by the participant). We used the Electric  
183 Geodesics, Inc, (EGI) GES 300 platform (Tucker, 1993), a Net Amps 300 amplifier, and  
184 128-channel electrode nets to acquire data with a 1 kHz sampling rate and vertex reference.  
185 Before beginning the EEG block, we verified that electrode impedances were below 60 k $\Omega$   
186 (Ferree et al., 2001).

## 187 **2.4 EEG preprocessing**

188 Continuous EEG recordings were preprocessed offline in MATLAB after export using Net  
189 Station software. The data preprocessing procedure used here is described in detail in  
190 B. Kaneshiro et al. (2021). Briefly, data were preprocessed on a per-recording basis: Each  
191 recording was highpass (above 0.3 Hz), notch (between 59 and 61 Hz) and lowpass (below  
192 50 Hz) zero-phase filtered before being downsampled from 1 kHz to 125 Hz. Epochs for  
193 each stimulus were 5 minutes (37501 time samples) in length and precisely timed from the  
194 audio pulses. Ocular and EKG artifacts were removed using ICA (Jung et al., 1998), data  
195 were converted to average reference, and data from bad electrodes or noisy transients were  
196 replaced with a spatial average of data from neighboring electrodes. After preprocessing,  
197 each trial of data was a 2D electrode-by-time matrix ( $125 \times 37501$ ). The matrices contained  
198 data from 125 electrodes as we excluded the four sensors over the face (electrodes 125–  
199 128) and reconstituted the reference sensor during preprocessing (B. B. Kaneshiro, 2016;  
200 Losorelli et al., 2017; B. Kaneshiro et al., 2020, 2021). During preprocessing, participant  
201 S08’s response to the Tremolo stimulus was flagged as containing excessive noise artifacts;  
202 therefore we excluded this trial from further analysis, but retained other trials from this  
203 participant.

204 After preprocessing, we aggregated trials into 3D electrode-by-time-by-participant data  
205 matrices for each stimulus. As a result, responses to Original, Abrupt Change, Segment  
206 Shuffle, and Remix stimuli were stored in  $125 \times 37501 \times 30$  matrices, while responses to  
207 Tremolo were stored in a  $125 \times 37501 \times 29$  matrix.

## 208 **2.5 Data analysis**

209 Figure 3 summarizes our analysis pipeline for the EEG and CB data. EEG was recorded  
210 from participants in Block 1, and participants provided CB reports of engagement in Block 2.  
211 Participants also rated the stimuli in both blocks. We computed ISC of both the EEG and  
212 CB measures, and also computed mean CB across participants. Finally, we analyzed the

213 ratings to determine whether they differed significantly according to stimulus.

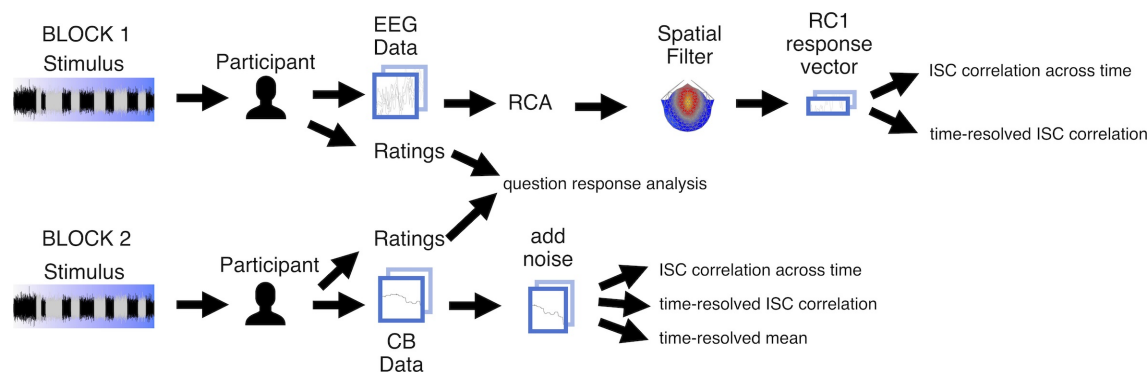

Figure 3: Analysis pipeline for experiment data. Participants heard each of the five stimuli twice, once in each block. During Block 1 we recorded EEG, and during Block 2 participants completed the continuous behavioral (CB) task. Participants answered questions about each stimulus after hearing it. For the EEG data we computed spatial components maximizing temporal correlation and projected electrode-by-time response matrices to component-by-time vectors. For vectorized EEG as well as CB vectors, we then computed inter-subject correlation (ISC) of the vectors on a per-stimulus basis, across time and in a time-resolved fashion. We additionally computed the time-resolved mean values between participants. We aggregated and analyzed ratings.

### 214 2.5.1 Spatial Filtering of EEG Data

215 Previous EEG ISC studies have prepended a spatial filtering operation before computing  
216 correlations in order to maximize signal-to-noise ratio of the data while also reducing the  
217 dimensionality of each EEG trial from a space-by-time matrix to a time vector (Dmochowski  
218 et al., 2012). Therefore, we filtered the EEG data using Reliable Components Analysis  
219 (RCA) prior to computing ISC (Dmochowski et al., 2012, 2015). RCA maximizes across-  
220 trials covariance of EEG responses to a shared stimulus relative to within-trials covariance,  
221 and therefore maximizes correlated activity across trials (i.e., ISC). It is similar to PCA,  
222 but maximizes correlation across trials as opposed to variance explained in a single response  
223 matrix. Like PCA, RCA involves an eigenvalue decomposition of the data, and therefore  
224 returns multiple spatial filters as eigenvectors; and corresponding coefficients as eigenvalues  
225 (Dmochowski et al., 2012).

226 We used a publicly available MATLAB implementation (Dmochowski et al., 2015), com-  
227 puting RCA separately for each stimulus. Following B. Kaneshiro et al. (2020), we computed

228 the top five reliable components. We observed a sharp drop in RC coefficients after the first,  
229 most-correlated component (RC1); given that past research has reported negligible ISC in  
230 subsequent RCs in this scenario (B. Kaneshiro et al., 2021), we proceeded with ISC analyses  
231 using RC1 data only, as was done by B. Kaneshiro et al. (2020). In presenting the com-  
232 ponent topographies on a scalp map, each weight vector was multiplied by  $\pm 1$  such that  
233 frontal electrodes were associated with positive weightings; this was for visualization only,  
234 and polarity of the projected data does not impact computed correlations.

### 235 **2.5.2 Inter-Subject Correlation Analyses**

236 We followed the procedure of B. Kaneshiro et al. (2021) to compute the EEG ISC of RC1  
237 response vectors. First, we computed ISC across the entire duration of each stimulus. Fol-  
238 lowing this, we computed ISC in a time-resolved fashion, over 5-second windows with a  
239 1-second shift between windows. This gave us a total of 296 time-resolved ISC points across  
240 each stimulus with a temporal resolution of 1 second. ISC for each participant was computed  
241 in a one-against-all fashion (the correlation of each participant’s RC1 response vector with  
242 every other participant’s response vector for a given stimulus). We report the mean ISC  
243 across participants and additionally visualize single-participant correlations for all-time ISC  
244 and standard error of the mean for time-resolved ISC.

245 For the CB responses, we computed mean CB at each time sample, as well as CB ISC  
246 both across entire excerpts and in the short time windows described above. CB responses  
247 were already in vector form for each participant, so we did not perform any operation akin  
248 to EEG spatial filtering before computing means and ISC. At times, individual participants  
249 did not move the slider in a given five-second window, which would produce missing values  
250 when computing correlations. To address this issue, for the CB ISC analyses *only* we added  
251 a small amount of noise, uniformly distributed over the interval  $\pm 0.001$ , independently to  
252 each CB response vector prior to computing ISC. As with the EEG data, we report means  
253 and single-participant values for analyses across entire stimuli, and means with standard

254 error of the mean for time-resolved measures.

### 255 **2.5.3 Statistical analyses**

256 Significance of each EEG result was computed using permutation testing. As described in  
257 detail in previous studies (B. Kaneshiro et al., 2020, 2021), we conducted each EEG analysis  
258 1,000 times; in each iteration, the phase spectrum of each EEG trial input to RCA had been  
259 randomized (Prichard & Theiler, 1994). The distribution of 1,000 outcomes for each analysis  
260 then served as the null distribution for assessing significance of the observed result. We  
261 performed a similar procedure to create null distributions for CB ISC, independently phase  
262 scrambling each CB response vector prior to computing ISC—also over 1,000 iterations.

263 Behavioral ratings, EEG ISC computed over entire stimuli, and CB ISC computed over  
264 entire stimuli were each analyzed using R (Ihaka & Gentleman, 1996; R Core Team, 2019)  
265 and lme4 (Bates et al., 2012). Here we performed a linear mixed-effects analysis of the  
266 relationship between response values and stimulus conditions, with fixed effect of condition  
267 (Original, Abrupt Change, Segment Shuffle, Remix, and Tremolo) and random effect of  
268 participant in each model. As in B. Kaneshiro et al. (2020), ordinal behavioral ratings were  
269 treated as approximately continuous (Norman, 2010). Following this we conducted two-tailed  
270 pairwise t-tests to assess differences between pairs of stimulus conditions.

271 Results for analyses involving multiple comparisons were corrected using False Discovery  
272 Rate (FDR, Benjamini & Yekutieli (2001)). For discrete results, we corrected for multiple  
273 comparisons on a per-stimulus basis (EEG ISC and CB ISC data: ten paired comparisons  
274 over five stimulus conditions; behavioral ratings: ten paired comparisons per stimulus; RC  
275 coefficients: five unpaired comparisons per stimulus). We performed no temporal cluster  
276 correction on the time-resolved ISC: as noted by B. Kaneshiro et al. (2021), temporal depen-  
277 dence was accounted for in the phase-scrambling procedure underlying the permutation test-  
278 ing, which preserves autocorrelation characteristics of the original response data (Prichard  
279 & Theiler, 1994; Lancaster et al., 2018).



## 3 Results

In order to examine engagement with an example of musical minimalism, we used inter-subject correlation (ISC) to analyze EEG and continuous behavioral (CB) responses from 30 adult participants who heard an intact excerpt of Steve Reich’s *Piano Phase*, three manipulated control stimuli, and a professional remix of Reich’s piece. We analyzed EEG and CB ISC in two ways: an aggregate ISC value for each stimulus (full-time EEG ISC, full-time CB ISC) and time-resolved ISCs for both EEG and CB data. Each participant also gave ordinal ratings of each stimulus (behavioral ratings).

### 3.1 Remix Stimulus Garnered Highest Behavioral Ratings

After hearing each stimulus in Block 1, participants used a 1–9 scale to rate how pleasant, musical, well ordered, and interesting they found each excerpt. Later, in Block 2, they used the same scale to report their overall level of engagement with each stimulus. Based on a repeated-measures ANOVA, ratings for all five questions were found to differ significantly by condition (Figure 4): pleasant ( $\chi^2(4) = 126.03, p < 0.001$ ), musical ( $\chi^2(4) = 139.78, p < 0.001$ ), well ordered ( $\chi^2(4) = 37.996, p < 0.001$ ), interesting ( $\chi^2(4) = 104.29, p < 0.001$ ), and engaging ( $\chi^2(4) = 127.92, p < 0.001$ ). Note that here we present the statistics in a question-wise fashion in order to emphasize differences between stimuli, in Figure 4 we grouped question responses by stimulus to emphasize patterns within stimuli.

Follow-up pairwise t-tests comparing responses between conditions showed a similar pattern for four of the five questions (see Tables S2-S6 for all p-values). For pleasant, musical, interesting, and engaging ratings, Remix was significantly higher than the other four conditions ( $p_{FDR} < 0.01$ , 10 comparisons) and Tremolo was significantly lower than the other four conditions ( $p_{FDR} < 0.01$ ). However, these ratings did not differ significantly between Original, Abrupt Change, and Segment Shuffle conditions.

Ratings for how “well ordered” the stimuli were followed a slightly different pattern.

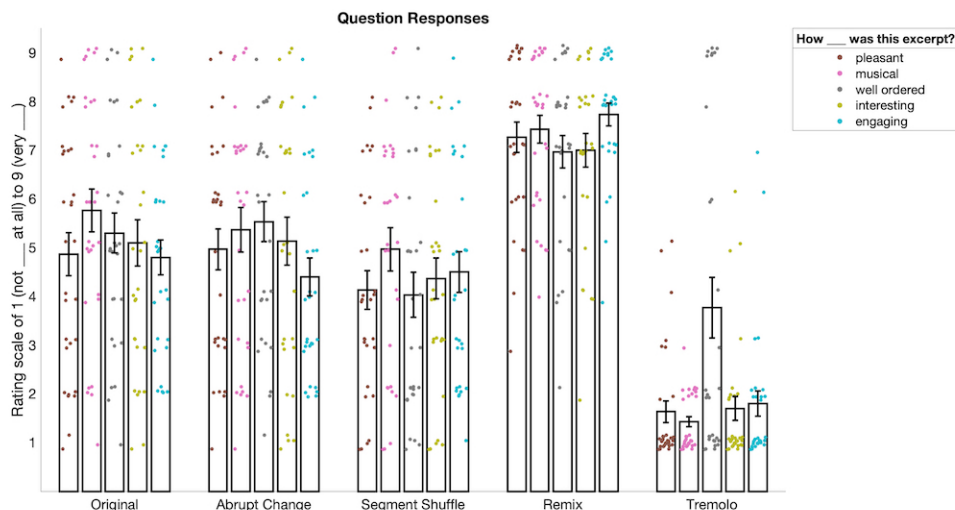

Figure 4: Behavioral ratings for all questions in the experiment (responses were ordinal and are slightly jittered for visualization only). Ratings for “pleasant”, “musical”, “well ordered”, and “interesting” come from Block 1 and ratings for “engaging” come from Block 2. For pleasant, musical, interesting, and engaging, responses for Remix were significantly higher than for the other conditions. For these same questions, responses were also significantly lower for Tremolo compared to all other conditions. For ratings of well ordered, we saw a similar pattern except that Abrupt Change was significantly higher than Segment Shuffle.

305 While Remix was significantly higher than all other conditions (see Table S4), Tremolo was  
 306 significantly lower than all other conditions except Segment Shuffle ( $p_{FDR} = 0.719$ ). In  
 307 addition, Segment Shuffle was significantly lower than Abrupt Change ( $p_{FDR} = 0.036$ ).

### 308 **3.2 Full-Stimulus EEG ISC is Highest for Remix, Lowest for Tremolo**

309 In computing the EEG ISCs, we first spatially filtered the responses for each stimulus in  
 310 order to reduce their dimensionality from 125 electrodes to a single, maximally correlated  
 311 spatial component (RC1) for each stimulus. These components are shown in Figure 5A.  
 312 While our spatial filtering technique returned multiple components, we focus only on the  
 313 first component because it is the only component with statistically significant coefficients  
 314 for the majority of stimuli: Figure 5B demonstrates that RC1 was the only significant  
 315 component for most stimuli (permutation testing; Original, Abrupt Change, Segment Shuffle,  
 316 Remix  $p_{FDR} < 0.001$ ; Tremolo  $p_{FDR} = 0.379$ ; see Table S7 for all p-values). Remix also had

317 a significant RC4 and Tremolo had no significant RCs. The topographies and coefficient  
318 significance for RC1 are in line with those computed in previous music EEG ISC studies  
319 (B. Kaneshiro et al., 2020, 2021); given that subsequent RCs did not correspond to significant  
320 ISC in a closely related study with similar distributions of coefficients (B. Kaneshiro et al.,  
321 2021), here we compute ISC only for RC1.

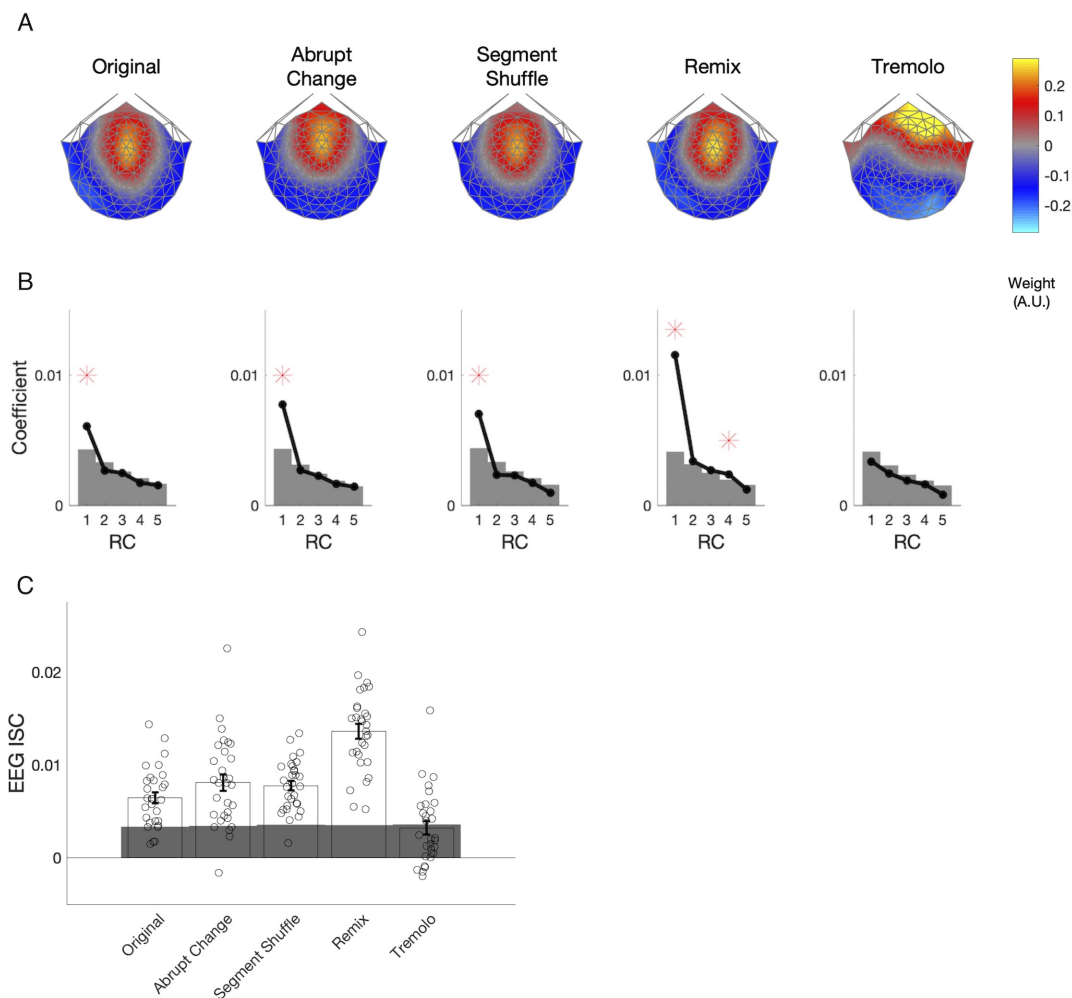

Figure 5: EEG components, coefficients, and aggregate ISC. (A) Spatial filter weights are visualized on a scalp model using forward-model projections. Maximally reliable components (RC1) exhibit consistent auditory topographies for all stimulus conditions except Tremolo. (B) Spatial filter eigenvalues serve as component coefficients. Significant coefficients are marked with red asterisks and significance thresholds; gray areas denote the 95th percentile of the null distribution. RC1 is statistically significant for all conditions except Tremolo. (C) ISC was computed over the entire duration of each stimulus. Remix elicited significantly higher ISC than all the other conditions, and Tremolo elicited significantly lower ISC than all other conditions.

322 When computed over the entire duration of a stimulus, EEG ISC differed significantly

323 by condition (repeated-measures ANOVA,  $\chi^2(4) = 96.002$ ,  $p < 0.001$ ). Follow-up pair-  
324 wise comparisons indicated that Original, Abrupt Change, Segment Shuffle, and Tremolo all  
325 significantly differed from Remix ( $p_{FDR} < 0.001$ ), and Original, Abrupt Change, Segment  
326 Shuffle, and Remix all differed from Tremolo ( $p_{FDR} < 0.001$ ). Figure 5C shows the direction  
327 of these significant differences: Remix garnered higher overall EEG ISC values than the  
328 other conditions, while Tremolo received the lowest overall values. Despite their structural  
329 differences, ISC among Original, Abrupt Change, and Segment Shuffle did not differ signifi-  
330 cantly from one another when computed over entire excerpts (see Table S8 for a full list of  
331 p-values).

### 332 **3.3 Full-Stimulus CB ISC Aligns Broadly with EEG ISC**

333 To analyze the CB ISC values (Figure 6), we followed the same procedures used for comparing  
334 EEG ISC computed over entire stimuli. These values significantly differed by condition  
335 ( $\chi^2(4) = 180.2$ ,  $p < 0.001$ ). Pairwise comparisons revealed that Remix had higher ISC than  
336 all other conditions, Tremolo had lower ISC than all other conditions, and Segment Shuffle  
337 had higher ISC than all conditions except Remix. All condition comparisons were significant  
338 except for Original versus Abrupt Change ( $p_{FDR} = 0.87$ ; all other comparisons,  $p_{FDR} < 0.05$ ,  
339 see Table S9 for a full list).

### 340 **3.4 Time-Resolved Measures Coincide with a Subset of Musical** 341 **Events**

342 In addition to calculating the overall ISC for EEG and CB data, we were interested in observ-  
343 ing changes in ISC over the course of the stimuli. After computing ISC over short, shifting  
344 time windows, we visualized the ISC trajectory over time. Permutation testing provided  
345 a time-varying statistical significance threshold, allowing us to see when participants, as a  
346 group, delivered significantly correlated responses. Below we give a qualitative assessment of

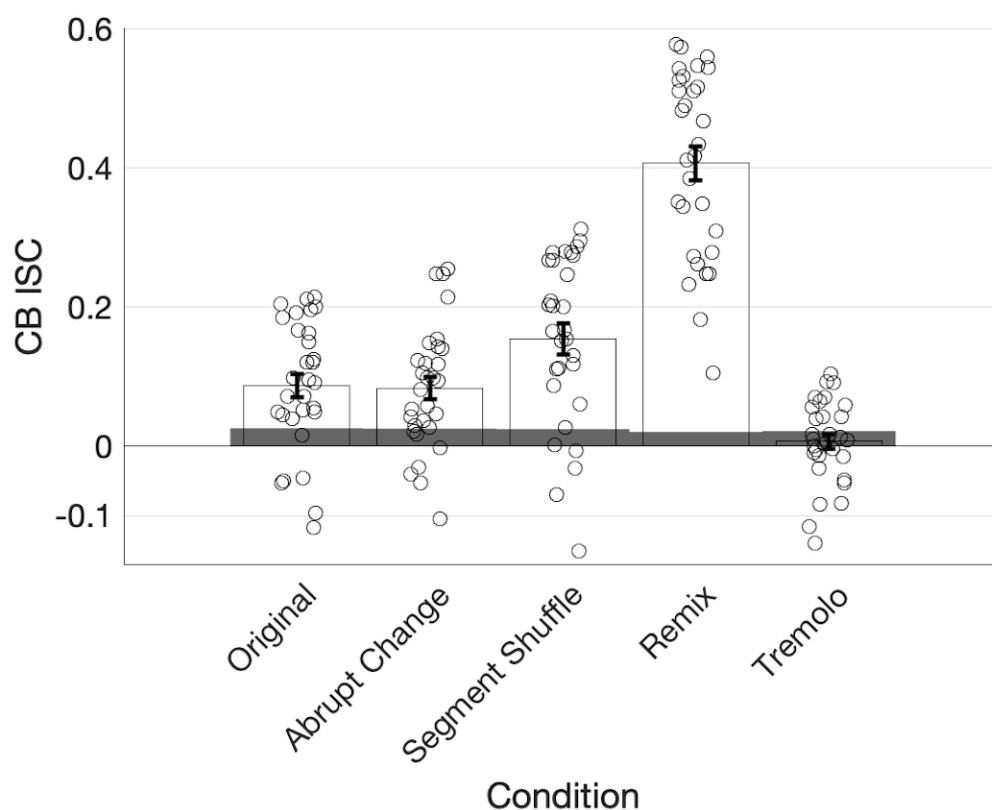

Figure 6: ISC of continuous behavioral (CB) reports of engagement for each condition with individual participant data and standard error of the mean plotted. Remix elicited significantly higher ISC than all the other conditions and Tremolo elicited significantly lower ISC than all the other conditions. Segment Shuffle also differs significantly from all other conditions.

347 these results (Figure 7). Note that although EEG and CB ISC data had different sampling  
348 rates, we used identical time window lengths (5 seconds) and shifts (1 second) to facilitate  
349 comparison. We plot time-resolved ISC at the center of each temporal window. This means  
350 significant ISC implicates activity from  $\pm 2.5$  seconds around each time point.

351 Responses to the Original stimulus show small but significant ISC peaks in the EEG  
352 data (permutation test  $p < 0.05$ , uncorrected; see Methods), with statistically significant  
353 ISC in 16.9% of the time windows (Table 1). The largest ISC peaks appear around the  
354 approximate start times of phasing sections, or shortly thereafter. Each of the phasing  
355 section onsets (marked in Figure 7A with dotted lines) is accompanied by a significant peak  
356 with the exception of the third phasing section. While phasing elicits ISC peaks relatively

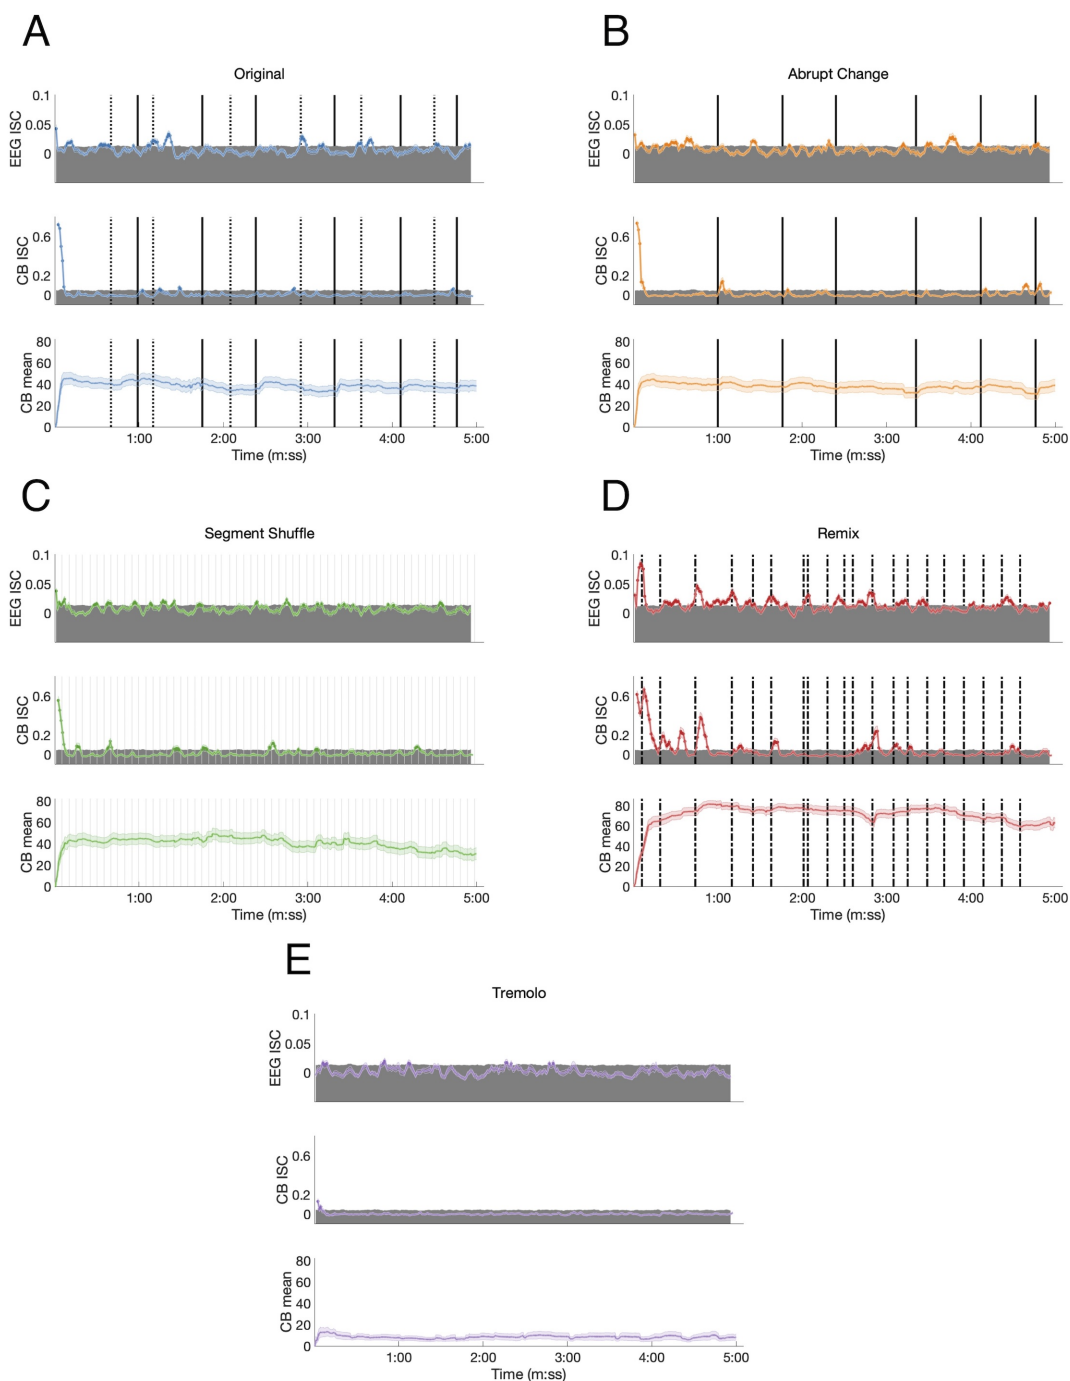

Figure 7: Time-resolved EEG ISC, CB ISC, and CB means for each condition. (A) Original: Dotted lines mark the start of phasing sections, solid lines mark the start of in-phase sections. (B) Abrupt Change: Solid lines mark the start of each new in-phase section. (C) Segment Shuffle: Light gray lines mark the start of each new segment. (D) Remix: Dashed lines mark musical events expected to be significant to listeners. (E) Tremolo.

357 consistently, in-phase sections fail to correspond to any significant ISC peaks. Both EEG  
358 and CB ISC also contain a significant peak at the start of the excerpt. In the time-resolved  
359 CB ISC data, only a handful of small peaks occur above the significance threshold after the  
360 initial drop; they seem unrelated to phasing and in-phase musical events, and only 4.7% of  
361 the ISC values are significant (Table 1). In contrast with phasing sections eliciting consistent  
362 peaks in the EEG ISC data, the CB mean data shows an increase in mean engagement rating  
363 after the start of each in-phase section. There also appears to be a slight decrease across the  
364 length of the stimulus.

365 EEG ISC data for the Abrupt Change condition shows significant peaks within five  
366 seconds of the in-phase shifts (shifts number two, three, five and six as marked in solid  
367 lines in Figure 7B; (18.6% of ISC values are significant; see Table 1)). In contrast with the  
368 Original condition, in the Abrupt Change condition, where in-phase sections begin suddenly,  
369 they seem to elicit ISC peaks in the EEG data. The other small significance peaks in the EEG  
370 data come between in-phase changes, perhaps as participants anticipate stimulus alterations  
371 during the long stretches of unchanging material (perhaps something like the contingent  
372 negative variation between warning and imperative stimuli, (Tecce, 1972)). After an initial  
373 descent, the CB ISC data shows significant peaks around the first two and final two in-phase  
374 changes (percentage of significant time-resolved CB ISCs = 7.0%; see Table 1). The other  
375 two significant peaks appear between in-phase changes, perhaps related to the effect noted  
376 above. As in the Original condition, time-resolved CB mean data shows slight increases in  
377 engagement ratings after all six abrupt changes and an overall decline in engagement.

378 The perennially unpredictable changes in Segment Shuffle were met with frequent, small  
379 bursts of significant ISC correlations in the EEG data (Figure 7C; 15.9% significant ISC  
380 values; see Table 1). Comparing EEG and CB ISC time courses reveals unreliable alignment:  
381 After the initial drop in CB data, eight significant peak bursts unfold; about half of them  
382 align with EEG peaks (see peaks around time 1:30 and 3:05) while the other half do not (see  
383 peaks around time 0:15 and 2:30). CB means show small bumps in engagement ratings in



384 the midst of a long-term downward trend (percentage of significant time-resolved CB ISCs  
385 = 10.3%; see Table 1).

386 Time-resolved ISCs for the Remix condition give ample opportunity to correlate peaks  
387 with musical events, with statistically significant EEG ISC in 45.6% time windows and  
388 significant CB ISC in 25.9% of time windows (Table 1). We selected the coded events in  
389 Figure 7D based on moments in the work that we deemed most musically salient (see Table  
390 S1 for the timings and descriptions of all twenty events). Note that not all of these events  
391 aligned with ISC peaks, but here we discuss some that did. After a sample from *Piano*  
392 *Phase* is presented for the first few seconds of Remix, a dramatic drum machine attack  
393 builds into simultaneous entrances for a synth countermelody and marimba riff (0:06). This  
394 build up and entrance align with the first and largest peak in the EEG data. The second  
395 peak in the EEG data comes at what might be the most dramatic moment in the piece, a  
396 beat drop anticipated with a drum machine lick (0:44). Note the potentially related peak  
397 in the CB ISC data following this event. But ISC peaks are not always elicited in both  
398 EEG and CB data. For example, the neighboring musical moments around minute 2:00  
399 arise from a sudden dropping out of the percussion for a few seconds (2:01), leaving only a  
400 low, meandering synth line and a *Piano Phase* sample until the percussion reenters (2:04).  
401 This double event seems associated with an EEG ISC peak but no significant CB activity.  
402 A similar compositional technique plays out before minute 3:00. Two coded lines before  
403 that time (2:36), all instruments drop out except for the *Piano Phase* sample. It goes on,  
404 unchanging, until lush pitched percussion (a marimba) and additional synth lines enter at  
405 2:50 (the line just before minute 3:00 in Figure 7D). The ISC peaks in both the EEG and  
406 CB data anticipate the reentry of additional instrumental lines, possibly in line with the  
407 previously mentioned effect: an anticipation that something must be coming given the static  
408 situation.

409 We did not expect any significant EEG ISC peaks for Tremolo, with its static, stark  
410 content. We see only occasional, small peaks above significance (Figure 7E; percentage of



411 significant time-resolved EEG ISCs = 7.4%; percentage of significant time-resolved CB ISCs  
412 = 1.0%; see Table 1). We also note that in contrast to the other stimulus conditions, the  
413 time-resolved EEG ISC for this condition does not include a significant peak at the beginning  
414 of the excerpt. However, similar to the control condition in B. Kaneshiro et al. (2020), this  
415 RC1 differs in topography from the other conditions (Figure 5A) and is not statistically  
416 significant (Figure 5B), complicating interpretation of the ISC time course.

417 Comparing the present percentages of significant time-resolved ISCs for EEG data in  
418 RC1 with those reported by B. Kaneshiro et al. (2021) shows that our highest EEG ISC (for  
419 Remix) eclipses their finding of 37% (in response to Elgar’s cello concerto); our Original,  
420 Abrupt Change, and Segment Shuffle stimuli elicit higher percentages of significant ISC than  
421 their control condition (an envelope-scaled but otherwise temporally unstructured manip-  
422 ulation); and our Tremolo condition approximates the percentage found for their control  
423 condition (8%).

## 424 4 Discussion

425 We tested the limits of inter-subject correlation (ISC) as a measure of engagement with  
426 musical stimuli using Steve Reich’s *Piano Phase* as well as manipulated and remixed versions  
427 of the work. By comparing ISC results for EEG and continuous behavioral (CB) responses  
428 as well as behavioral ratings, we found no clear differences between manipulations based on  
429 compositional techniques (Original, Abrupt Change, and Segment Shuffle), but consistently  
430 high correlations and ratings for a popular-music version (Remix), and low correlations and  
431 ratings for a version featuring extreme repetition (Tremolo). These findings may underscore  
432 the subtlety of a core minimalist technique (phasing) and may also clarify some limits of  
433 ISC as a measure of engagement with auditory stimuli.

434 The varied measures we collected (EEG, CB, behavioral ratings) align when viewing  
435 aggregate measures over entire stimuli. Aggregate EEG ISC and CB ISC, as well as behav-

436 ioral ratings show Remix garnering significantly higher values than the other conditions, and  
437 Tremolo significantly lower values than the other conditions (see also the strong correlations  
438 between overall CB means and overall behavioral ratings of engagement in Figure S2). From  
439 this overall stance, EEG ISC values for Original, Abrupt Change, and Segment Shuffle do  
440 not differ from each other, and neither do participants' behavioral ratings (with the single  
441 exception of ratings for "well ordered" mentioned above). Note that overall CB ISC has a  
442 slightly different pattern than EEG ISC, with CB ISC for Segment Shuffle pulling statisti-  
443 cally ahead of Original and Abrupt Change. At the time-resolved level we notice differences  
444 between EEG ISC and other measures. Phasing sections in the Original, with their many  
445 and unpredictable onsets, elicit neural ISC but fail to generate CB ISC. Participants seemed  
446 to drift towards higher engagement ratings at the start of in-phase sections (see CB means),  
447 perhaps returning attention to the stimulus when it emerges from complex phasing sections  
448 back towards unison clarity (in-phase sections). We also noted the mix of alignment and in-  
449 dependence between neural and behavioral measures in Remix, again with low-level acoustic  
450 changes attracting neural attention that elicits no behavioral ISC. Differences between EEG  
451 and CB ISC were also noted in Abrupt Change and Segment Shuffle conditions.

452 Previous studies have reported decreased ISC when music stimuli are repeated (Madsen et  
453 al., 2019; B. Kaneshiro et al., 2020). One explanation of our findings is that highly repetitive  
454 music (such as minimalism and Reich's phasing process) will elicit lower engagement, and  
455 thus, lower ISC values. Certainly, our Tremolo condition offers an extreme test and seeming  
456 confirmation of this hypothesis. More varied stimuli still featuring high levels of repetition—  
457 i.e., Original, Abrupt Change, and Segment Shuffle—yielded higher EEG and CB ISC than  
458 Tremolo. Remix's frequently changing musical parameters resulted in rather high ISC. One  
459 could argue that the more repetitive the stimulus was, the less interesting it may have been,  
460 and thus, less engaging.

461 Yet, as some have pointed out (Madsen et al., 2019; B. Kaneshiro et al., 2021), ISC  
462 measures *shared* engagement. Put another way, ISC can only pick up on forms of engagement

463 that unfold similarly between multiple participants. Other types of engagement, be they  
464 idiosyncratic, or only shared by a few participants, would not show up. The strongest  
465 empirical evidence for such a view of our current data comes from individual CB responses  
466 (Figure S1). In said data, at least two participants (the highest two lines of raw data)  
467 show patterns of high and dynamic engagement in the Tremolo condition, a condition where  
468 we predicted and found very low EEG and CB ISC. Previous theoretical and empirical  
469 work bolsters the idea of multiple styles of engagement. The transportation and cognitive  
470 elaboration framework for engagement posit two strands of engagement: transportation,  
471 where audience members are locked into the content of the art object, tracking details; and  
472 cognitive elaboration, where an observer or listener is prompted by the stimulus to reflect  
473 on the artwork, drawing connections with other experiences and other knowledge (Green &  
474 Brock, 2000). David Huron's listening styles offer even more potential types or modes of  
475 engagement, ranging from mentally singing along to mentally reminiscing about musically  
476 associated memories (Huron, 2002). ISC would be unlikely to pick up on these listening  
477 styles equally, and it would be odd if a single measure could.

478 Some cognitive science of music scholars have argued that repetition could augment  
479 individualized, internally focused experiences by gradually demanding less processing power  
480 and attention over time. Such a process may open up reflective space for listeners (Margulis,  
481 2014). (This is in contrast with the type of engagement that might occur during dramatic  
482 moments like the beat drop in the first minute of Remix.) In *Piano Phase*, such a trajectory  
483 could be cyclical, with listeners drifting off into individual experience and tugged back into  
484 the details of the ongoing external stimulus events by changes in the music. If enough  
485 participants were drawn back to the stimulus details at the same time, neural responses  
486 could become sufficiently correlated to produce an ISC peak (perhaps something like the peak  
487 around minute 3:00 in the Original EEG ISC time-resolved data). In this line of thought,  
488 musicologists and music theorists have noted the long trajectories of expectation formation  
489 in minimalist music such as Reich's. Cadences in tonal music often drive and ultimately

490 resolve such expectations (what key are we in? where are we in the phrase? what harmonic  
491 and melodic activity is likely to come next?). Cadences and their accompanying harmonic  
492 trajectories are also present in minimalism but often in a stretched out form (Fink, 1996).  
493 Some listeners may lose interest along the way, while others may be drawn into granular  
494 detail and vary in what layer of granularity they are caught up in. Perhaps most move from  
495 state to state: For examples of the former situation, two participants in the present study  
496 noted that the Tremolo stimulus was difficult to listen to—“intense” in the words of one.  
497 Another participant stated that to them the stimuli were “all the same but with different  
498 layers.”

499 While our primary interest was engagement patterns in *Piano Phase*, this study was also  
500 motivated by a desire to clarify and delimit what EEG ISC may index. Previous literature  
501 has emphasized ISC as a measure of engagement, defined as “emotionally laden attention”  
502 (Dmochowski et al., 2012). A number of earlier findings raise questions about this rela-  
503 tionship. Frequently and unexpectedly changing stimuli seem capable of driving correlated  
504 neural responses, perhaps pointing to a relationship between ISC and something like the  
505 orienting response (voluntary and automatic neural and behavioral responses to novel infor-  
506 mation, (E. Sokolov, 1990; E. N. Sokolov et al., 2002)). Dmochowski and colleagues reported  
507 relationships between EEG ISC and population ratings of Super Bowl commercials and found  
508 that an audio-visual stimulus with “repeated and jarring scene cuts” associated with “rela-  
509 tively strong neural reliability” drove ISC measures above population ratings (this stimulus  
510 was ultimately excluded in order to maintain stronger predictive performance of population  
511 ratings; (Dmochowski et al., 2014, Supplementary Note 3)). Ki et al. (2016) found that nar-  
512 ratives in a foreign language elicited higher ISC than a narrative in the participants’ native  
513 language. Using two films as stimuli, Poulsen et al. (2017) reported a significant correla-  
514 tion between ISC and average luminance difference, suggesting that ISC for their primary  
515 component of interest “may indeed be driven by low-level visual evoked responses” (p. 5).  
516 Finally, B. Kaneshiro et al. (2020) noted that a stimulus manipulation in which measures of

517 music were randomly re-ordered (and thus musically less meaningful but more surprising)  
518 resulted in higher EEG ISC than intact music. In the current experiment, the extreme mu-  
519 sical parameters of minimalism, stimulus manipulations, and continuous behavioral ratings  
520 allowed us to further explore what ISC might index. If ISCs mark more cognitive-level,  
521 emotional engagement, manipulated stimuli with ostensibly less musical interest should re-  
522 sult in lower ISC than purportedly more musically meaningful stimuli. This was not the  
523 case when comparing Original with Abrupt Change and Segment Shuffle conditions (though  
524 these three conditions each had significantly higher overall EEG and CB ISC compared with  
525 the Tremolo stimulus—the most extreme control). Additionally, we can compare neural  
526 ISC with continuous behavioral responses and overall ratings: alignment between measures  
527 could support the “engagement” interpretation of neural ISC. The overall ISC and behav-  
528 ioral ratings mostly reinforce three groups: Remix on top, Original, Abrupt Change, and  
529 Segment Shuffle in the middle (statistically undifferentiated), and Tremolo at the bottom.  
530 When examining time-resolved data, we saw a mixture of alignment and difference between  
531 EEG and CB ISC. Given the partial overlap, perhaps it is safest to say that, if we choose  
532 to use the term “engagement”, it may need qualification: Perhaps the type, kind, or style  
533 of engagement indexed by EEG ISC is more sensory biased and less cognitively driven than  
534 the word engagement usually connotes.

535       Given the scope of data used in ISC analyses and the complexity of the culturally em-  
536 bedded stimuli with which participants are interacting, testing limit cases such as minimal-  
537 ism helps draw bounds around the interpretation and appropriate deployment of ISC as a  
538 measure of engagement. It also reveals new layers of detail for scholars who work on the  
539 repertoire—a testing ground for theories of how the music can function for individuals. On  
540 that front, this study suggests important follow up research. For instance, alpha activity is  
541 thought to reflect meditative states (Lee et al., 2018). Therefore, alternative approaches to  
542 analyzing the EEG data—e.g., by assessing alpha power, or correlation thereof—may prove  
543 more appropriate measures for indexing listener states while listening to minimalist music.

544 We might hypothesize that when participants are diversely engaged with a stimulus, a sim-  
545 ilar psychological state may be shared—but one that is better indexed by other means than  
546 EEG ISC. As alpha activity has been shown to index multiple states in varying locations,  
547 future research could also include interviews with music listeners to provide complementary  
548 insights into inter-individual differences in music listening. Such mixed-methods work could  
549 reveal patterns for calm versus bored listeners or time periods of boredom, interest, and  
550 relaxation.

## 551 **Conflict of Interest Statement**

552 The authors declare that the research was conducted in the absence of any commercial or  
553 financial relationships that could be construed as a potential conflict of interest.

## 554 **Author Contributions**

555 TD, DN, JB, and BK designed the experiment. TD, NG, JB, and BK created the stimuli.  
556 DN and BK created participant interfaces for the experiment. TD and DN collected the  
557 data. TD, DN, and BK curated the data. TD, JD, and BK specified formal and statistical  
558 analyses. TD and BK analyzed the data. TD and BK created the visualizations. TD and BK  
559 drafted the original manuscript. DN, NG, JD, and JB reviewed and edited the manuscript.  
560 JB and BK supervised the research.

## 561 **Funding**

562 This research was funded by the Wallenberg Network Initiative: Culture, Brain Learning  
563 (TD, DTN, JB, BK); the Patrick Suppes Gift Fund (DTN, BK); the Roberta Bowman  
564 Denning Fund for Humanities and Technology (JB, BK); the Army Research Laboratory  
565 W911-NF-10-2-0022 (JD); the Stanford Humanities Center (TD); and a Ric Weiland Grad-

566 uate Fellowship (TD). Open access publication fees were paid by the Stanford Center for  
567 Computer Research in Music and Acoustics.

## 568 Supplemental Data

569 The data generated and analyzed in this study can be found in the Naturalistic Music  
570 EEG Dataset—Minimalism (NMED-M) in the Stanford Digital Repository (<https://purl>  
571 [.stanford.edu/kt396gb0630](https://purl.stanford.edu/kt396gb0630)).

## 572 Data Availability Statement

573 The data generated and analyzed in this study can be found in the Naturalistic Music EEG  
574 Dataset—Minimalism (NMED-M) in the Stanford Digital Repository (Dauer et al., 2021).<sup>6</sup>

## 575 References

- 576 Bates, D., Maechler, M., Bolker, B., Walker, S., Christensen, R. H. B., Singmann, H., . . . Scheipl, F. (2012).  
577 Package ‘lme4’. *CRAN. R Foundation for Statistical Computing, Vienna, Austria*.
- 578 Benjamini, Y., & Yekutieli, D. (2001). The control of the false discovery rate in multiple testing under  
579 dependency. *The Annals of Statistics*, *29*(4), 1165–1188.
- 580 Brainard, D. (1997). The Psychophysics Toolbox. *Spatial Vision*, *10*(4), 433–436.
- 581 Cameron, D., Potter, K., Wiggins, G., & Pearce, M. (2017). Perception of rhythmic similarity is asymmetri-  
582 cal, and is influenced by musical training, expressive performance, and musical context. *Timing & Time*  
583 *Perception*, *5*(3-4), 211–227.
- 584 Cameron, D. J., Zioga, I., Lindsen, J. P., Pearce, M. T., Wiggins, G. A., Potter, K., & Bhattacharya, J.  
585 (2019). Neural entrainment is associated with subjective groove and complexity for performed but not  
586 mechanical musical rhythms. *Experimental brain research*, *237*(8), 1981–1991.

---

<sup>6</sup>Available at <https://purl.stanford.edu/kt396gb0630>.

- 587 Dauer, T. (2020). *The varieties of minimalist experience: The roles of psychological states in the reception of*  
588 *american minimalism during the long sixties* (Unpublished doctoral dissertation). Stanford University.
- 589 Dauer, T., Nerness, B., & Fujioka, T. (2020). Predictability of higher-order temporal structure of musical  
590 stimuli is associated with auditory evoked response. *International Journal of Psychophysiology*, *153*,  
591 53–64.
- 592 Dauer, T., Nguyen, D. T., Gang, N., Dmochowski, J. P., Berger, J., & Kaneshiro, B. (2021). Naturalistic  
593 music EEG dataset—Minimalism (NMED-M). In *Stanford digital repository*. Retrieved from [https://](https://purl.stanford.edu/kt396gb0630)  
594 [purl.stanford.edu/kt396gb0630](https://purl.stanford.edu/kt396gb0630)
- 595 Dmochowski, J. P., Bezdek, M. A., Abelson, B. P., Johnson, J. S., Schumacher, E. H., & Parra, L. C. (2014).  
596 Audience preferences are predicted by temporal reliability of neural processing. *Nature communications*,  
597 *5*(1), 1–9.
- 598 Dmochowski, J. P., Greaves, A. S., & Norcia, A. M. (2015). Maximally reliable spatial filtering of steady  
599 state visual evoked potentials. *Neuroimage*, *109*, 63–72.
- 600 Dmochowski, J. P., Sajda, P., Dias, J., & Parra, L. C. (2012). Correlated components of ongoing EEG point  
601 to emotionally laden attention—a possible marker of engagement? *Frontiers in human neuroscience*, *6*,  
602 112.
- 603 Ferree, T. C., Luu, P., Russell, G. S., & Tucker, D. M. (2001). Scalp electrode impedance, infection risk,  
604 and EEG data quality. *Clinical Neurophysiology*, *112*(3), 536–544.
- 605 Fink, R. W. (1996). *“arrows of desire”: Long-range linear structure and the transformation of musical*  
606 *energy* (Unpublished doctoral dissertation). University of California, Berkeley.
- 607 Green, M. C., & Brock, T. C. (2000). The role of transportation in the persuasiveness of public narratives.  
608 *Journal of personality and social psychology*, *79*(5), 701.
- 609 Hartenberger, R. (2016). *Performance practice in the music of steve reich*. Cambridge University Press.
- 610 Henahan, D. (1970). Steve Reich presents a program of pulse music at Guggenheim. *The New York Times*.
- 611 Huron, D. (2002). Listening styles and listening strategies. *Society for Music Theory Annual Conference*.
- 612 Ihaka, R., & Gentleman, R. (1996). R: A language for data analysis and graphics. *Journal of computational*  
613 *and graphical statistics*, *5*(3), 299–314.



- 614 Jung, T.-P., Humphries, C., Lee, T.-W., Makeig, S., McKeown, M. J., Iragui, V., . . . others (1998). Extended  
615 ICA removes artifacts from electroencephalographic recordings. *Advances in neural information processing*  
616 *systems*, 894–900.
- 617 Kaneshiro, B., Nguyen, D. T., Norcia, A. M., Dmochowski, J. P., & Berger, J. (2020). Natural music evokes  
618 correlated EEG responses reflecting temporal structure and beat. *NeuroImage*, *214*, 116559.
- 619 Kaneshiro, B., Nguyen, D. T., Norcia, A. M., Dmochowski, J. P., & Berger, J. (2021). Inter-subject EEG  
620 correlation reflects time-varying engagement with natural music. *bioRxiv*. doi: 10.1101/2021.04.14.439913
- 621 Kaneshiro, B. B. (2016). *Toward an objective neurophysiological measure of musical engagement* (Unpub-  
622 lished doctoral dissertation). Stanford University.
- 623 Ki, J. J., Kelly, S. P., & Parra, L. C. (2016). Attention strongly modulates reliability of neural responses to  
624 naturalistic narrative stimuli. *Journal of Neuroscience*, *36*(10), 3092–3101.
- 625 Lancaster, G., Iatsenko, D., Pidde, A., Ticcinelli, V., & Stefanovska, A. (2018). Surrogate data for hypothesis  
626 testing of physical systems. *Physics Reports*, *748*, 1-60. Retrieved from [https://www.sciencedirect](https://www.sciencedirect.com/science/article/pii/S0370157318301340)  
627 [.com/science/article/pii/S0370157318301340](https://www.sciencedirect.com/science/article/pii/S0370157318301340) (Surrogate data for hypothesis testing of physical  
628 systems) doi: <https://doi.org/10.1016/j.physrep.2018.06.001>
- 629 Lee, D. J., Kulubya, E., Goldin, P., Goodarzi, A., & Girgis, F. (2018). Review of the neural oscillations  
630 underlying meditation. *Frontiers in neuroscience*, *12*, 178.
- 631 Lloyd, K. (1966). ...And one evening when listeners ‘floated away’. *Vogue*.
- 632 Losorelli, S., Nguyen, D. T., Dmochowski, J. P., & Kaneshiro, B. (2017). NMED-T: A tempo-focused dataset  
633 of cortical and behavioral responses to naturalistic music. In *Proceedings of the 18th international society*  
634 *for music information retrieval conference* (pp. 339–346). doi: 10.5281/zenodo.1417917
- 635 Madsen, J., Margulis, E. H., Simchy-Gross, R., & Parra, L. C. (2019). Music synchronizes brainwaves across  
636 listeners with strong effects of repetition, familiarity and training. *Scientific reports*, *9*(1), 1–8.
- 637 Margulis, E. H. (2014). *On repeat: How music plays the mind*. Oxford University Press.
- 638 Mertens, W. (1983). *American minimal music: La monte young, terry riley, steve reich, philip glass*  
639 (J. Hautekiet, Trans.). London: Kahn & Averill.

- 640 Norman, G. (2010). Likert scales, levels of measurement and the “laws” of statistics. *Advances in health*  
641 *sciences education*, 15(5), 625–632.
- 642 Potter, K., Wiggins, G. A., & Pearce, M. T. (2007). Towards greater objectivity in music theory: Information-  
643 dynamic analysis of minimalist music. *Musicae Scientiae*, 11(2), 295–324.
- 644 Poulsen, A. T., Kamronn, S., Dmochowski, J., Parra, L. C., & Hansen, L. K. (2017). EEG in the classroom:  
645 Synchronised neural recordings during video presentation. *Scientific reports*, 7(1), 1–9.
- 646 Prichard, D., & Theiler, J. (1994, Aug). Generating surrogate data for time series with several simultaneously  
647 measured variables. *Phys. Rev. Lett.*, 73, 951–954. doi: 10.1103/PhysRevLett.73.951
- 648 R Core Team. (2019). R: A language and environment for statistical computing [Computer software manual].  
649 Vienna, Austria. Retrieved from <https://www.R-project.org/>
- 650 Reich, S. (1987). *Reich “early works”*. Double Edge.
- 651 Reich, S. (1999). *Reich remixed*. ArthroB/Nonesuch.
- 652 Reich, S. (2009). *Writings on music, 1965-2000* (P. Hillier, Ed.). Oxford: Oxford University Press.
- 653 Rockwell, J. (1973). Records: Roiling work: Reich’s ‘Four Organs,’ which created a stir at concert, is on  
654 Angel Disk Hyman’s Piano. *New York Times*.
- 655 Schubert, E., Vincs, K., & Stevens, C. J. (2013). Identifying regions of good agreement among responders  
656 in engagement with a piece of live dance. *Empirical Studies of the Arts*, 31(1), 1–20.
- 657 Sokolov, E. (1990). The orienting response, and future directions of its development. *The Pavlovian journal*  
658 *of biological science*, 25(3), 142–150.
- 659 Sokolov, E. N., Spinks, J. A., Näätänen, R., & Lyytinen, H. (2002). *The orienting response in information*  
660 *processing*. Lawrence Erlbaum Associates Publishers.
- 661 Strongin, T. (1969). Is timelessness out of style? *New York Times*, 21.
- 662 Tecce, J. J. (1972). Contingent negative variation (CNV) and psychological processes in man. *Psychological*  
663 *bulletin*, 77(2), 73.
- 664 Tucker, D. M. (1993). Spatial sampling of head electrical fields: The geodesic sensor net. *Electroencephalogra-*  
665 *phy and Clinical Neurophysiology*, 87(3), 154–163. doi: [http://dx.doi.org/10.1016/0013-4694\(93\)90121-B](http://dx.doi.org/10.1016/0013-4694(93)90121-B)

666 **Tables**

| <b>Stimulus</b> | <b>% significant time-resolved EEG ISC</b> | <b>% significant time-resolved CB ISC</b> |
|-----------------|--------------------------------------------|-------------------------------------------|
| Original        | 16.892%                                    | 4.65%                                     |
| Abrupt Change   | 18.581%                                    | 6.98%                                     |
| Segment Shuffle | 15.878%                                    | 10.30%                                    |
| Remix           | 45.608%                                    | 25.9%                                     |
| Tremolo         | 7.432%                                     | 1.00%                                     |

Table 1: Percentages of significant time-resolved ISC for each condition for both EEG and CB data.
